# Supplementary material for: Diffusion-controlled evolution of core–shell nanowire arrays into integrated hybrid nanotube arrays for Li-ion batteries
Source: Royal Society of Chemistry journal article supplement (doi:10.1039/c3nr01786a), 2013-01-01
Supplement: c3nr01786a.pdf [file c3nr01786a.pdf]

## Supplementary Information

### Diffusion-Controlled Evolution of Core-Shell Nanowire Array into Integrated Hybrid Nanotube Array for Li-Ion Batteries

Jian Jiang<sup>a,b</sup>, Jingshan Luo<sup>b</sup>, Jianhui Zhu<sup>a</sup>, Xintang Huang<sup>b</sup>, Jinping Liu<sup>a\*</sup>, and Ting Yu<sup>b\*</sup>

<sup>a</sup> Institute of Nanoscience and Nanotechnology, Department of Physics, Wuhan, P.R. China. E-mail: liujp@phy.ccnu.edu.cn; Fax: +86-027-67861185;

<sup>b</sup> Division of Physics and Applied Physics, School of Physical and Mathematical Sciences, Nanyang Technological University, Singapore, E-mail: yuting@ntu.edu.sg.

#### I. Figures

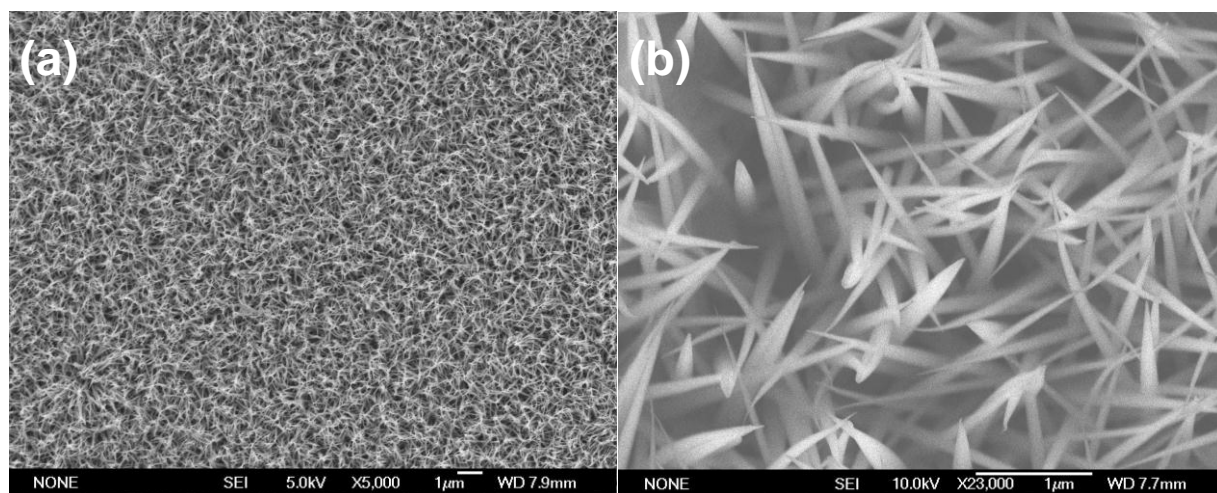

Fig. S1 (a-b) SEM images of single-crystalline  $\text{Co}(\text{CO}_3)_{0.5}(\text{OH})_{0.11}\text{H}_2\text{O}$  NWs grown on a Ti metal substrate.

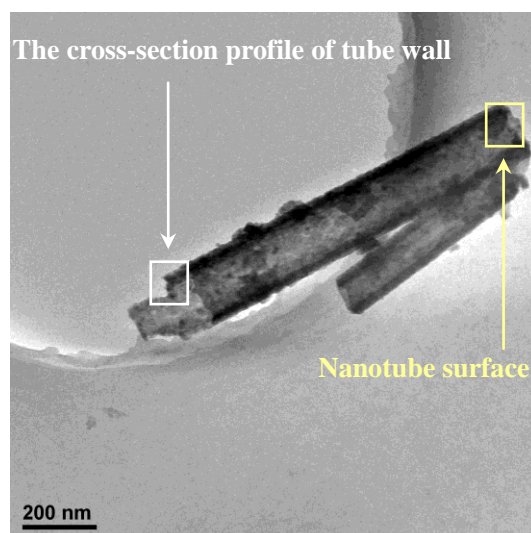

Fig. S2 TEM observation toward different places of a hybrid  $\text{CoO}/\text{CoTiO}_3$  nanotube.

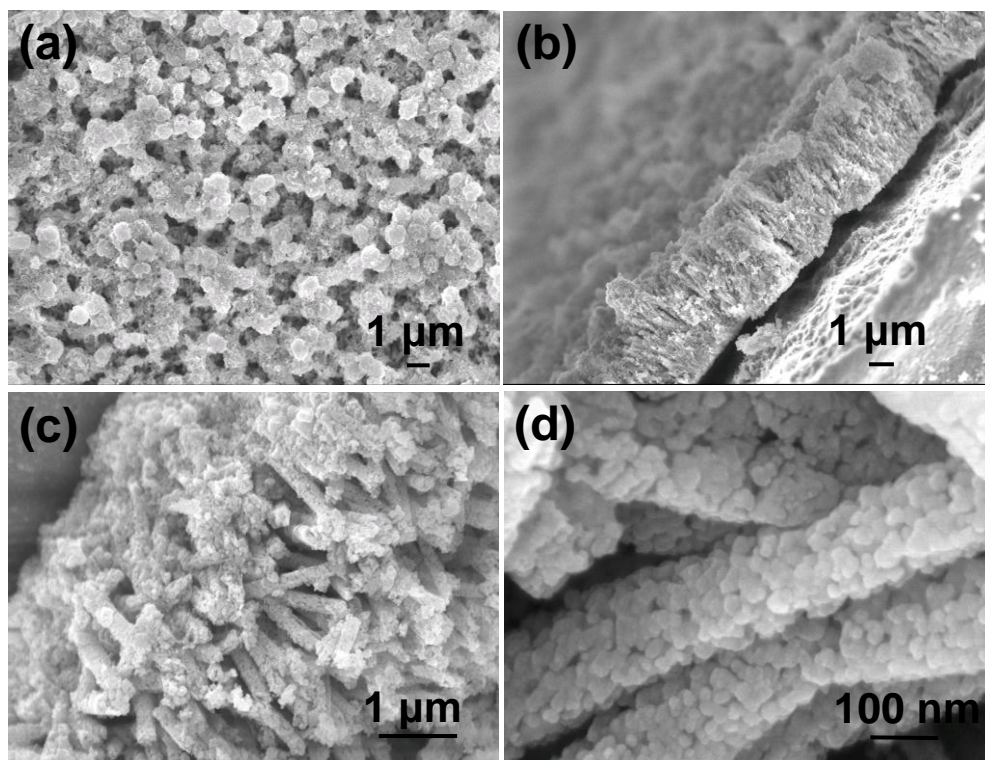

**Fig. S3** (a) Top-view, (b) cross-sectional and (c-d) inclined-view SEM observations toward CoO/CoTiO<sub>3</sub> hybrid NTs after 150 cycles.

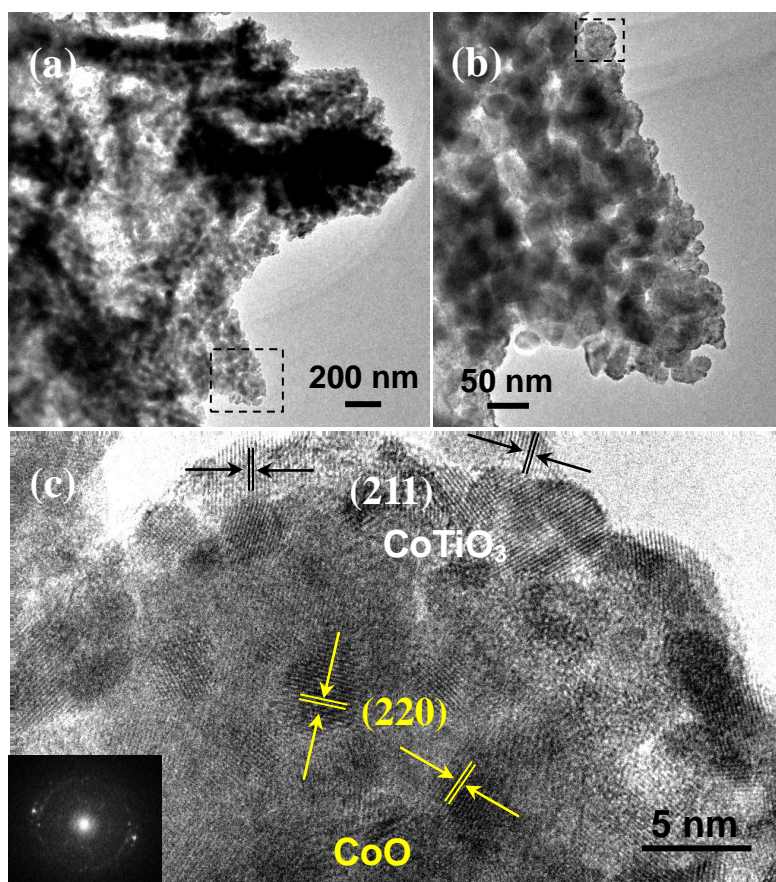

**Fig. S4** (a-c) TEM observations toward CoO/CoTiO<sub>3</sub> hybrid NTs after 150 cycles.

## II. The calculation details of CoTiO<sub>3</sub> theoretical capacity

For CoTiO<sub>3</sub> anode, the reversible electrochemical reaction is listed below,

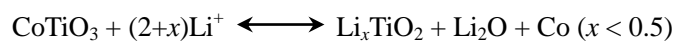

wherein  $x$  is the insertion coefficient of Li ions (the maximum theoretical value is ~0.5) [1-3]. The theoretical capacity of CoTiO<sub>3</sub> was calculated according to the equation:

$$C = \frac{26.8 \times n}{M} \times 1000$$

in which the maximum number “ $n$ ” of electrons transfer is 2.5, and the molar mass “ $M$ ” is 155. Thus, its capacity value is below 432 mAh/g.

## References

- [1] J.S. Chen, Y.L. Tan, C.M. Li, Y.L. Cheah, S. Madhavi, F.Y.C. Boey, L.A. Archer and X.W. Lou, *J. Am. Chem. Soc.*, 2010, **132**, 6124.
- [2] X.W. Lou and L.A. Archer, *Adv. Mater.*, 2008, **20**, 1853.
- [3] L. Kavan, M. Gratzel, J. Rathousky and A. Zukal, *J. Electrochem. Soc.*, 1996, **143**, 394.
